# Supplementary material for: A comparison of GC-FID and PTR-MS toluene measurements in ambient air under conditions of enhanced monoterpene loading
Source: Copernicus journal article supplement (doi:10.5194/amt-3-959-2010), 2010-07-23
Supplement: Supplementary file 1 [file amt-3-959-2010-supplement.pdf]

# Supplemental Information for “A comparison of GC-FID and PTR-MS toluene measurements in ambient air under conditions of enhanced monoterpene loading”

J. L. Ambrose<sup>1,2</sup>, K. Haase<sup>1,2</sup>, R. S. Russo<sup>2</sup>, Y. Zhou<sup>2</sup>, M. L. White<sup>2,3</sup>, E. K. Frinak<sup>2,4</sup>, C. Jordan<sup>2</sup>, H. R. Mayne<sup>1</sup>, R. Talbot<sup>2</sup>, and B. C. Sive<sup>2</sup>

[1] {Department of Chemistry, University of New Hampshire, Durham, New Hampshire}

[2] {Climate Change Research Center, Institute for the Study of Earth Oceans and Space, University of New Hampshire, Durham, New Hampshire}

[3] {Now at Northern Essex Community College, Haverhill, Massachusetts}

[4] {Now at USMA Network Science Center, West Point, New York}

Correspondence to: J. L. Ambrose (jambrose@alumni.unh.edu)

**Table S1.** Mixing ratio in pptv, per-carbon response factor (PCRF) and standard deviation (StdDev) of the PCRF for the Thompson Farm GC system whole air working standards (Std0 and DC2). For DC2, the pre-ICARTT and ICARTT PCRFs are listed to show the change in the monoterpene mixing ratios over the course of the campaign but the consistency of the *n*-decane PCRF.

| Compound               | Std0<br>(pptv) | ICARTT       |                | DC2<br>(pptv) | Pre-ICARTT  |               | ICARTT      |               |
|------------------------|----------------|--------------|----------------|---------------|-------------|---------------|-------------|---------------|
|                        |                | Std0<br>PCRF | Std0<br>StdDev |               | DC2<br>PCRF | DC2<br>StdDev | DC2<br>PCRF | DC2<br>StdDev |
| <i>n</i> -heptane      | 52             | 1.42         | 0.09           | 676           | 1.41        | 0.06          | 1.41        | 0.09          |
| toluene                | 101            | 1.41         | 0.06           | 1215          | 1.42        | 0.04          | 1.41        | 0.06          |
| <i>n</i> -octane       | 33             | 1.43         | 0.07           | 356           | 1.40        | 0.04          | 1.40        | 0.06          |
| ethylbenzene           | 30             | 1.41         | 0.07           | 304           | 1.40        | 0.04          | 1.41        | 0.05          |
| 1,2,4-TMB <sup>a</sup> | 54             | 1.40         | 0.08           | 285           | 1.42        | 0.04          | 1.41        | 0.06          |
| <i>n</i> -decane       | 38             | 1.42         | 0.07           | 290           | 1.41        | 0.04          | 1.42        | 0.09          |
| $\alpha$ -pinene       | -              | -            | -              | 469           | 1.41        | 0.06          | 1.36        | 0.11          |
| $\beta$ -pinene        | -              | -            | -              | 99            | 1.41        | 0.08          | 0.40        | -             |

<sup>a</sup>1,2,4-trimethylbenzene.

**Table S2.** The per-carbon response factor (PCRF) and standard deviation (StdDev) of the PCRF for the Thompson Farm GC system whole air working standard (DC2) and for two of the Apel-Riemer Environmental, Inc. gravimetric standards used for PTR-MS calibrations (Monoterpenes and Aromatics) during the ICARTT campaign. These results further validated the use of a single response factor for each group of compounds, specifically C<sub>7</sub> and C<sub>10</sub> NMHCs.

| Compound               | DC2<br>PCRF | DC2<br>StdDev | Apel-Riemer Gravimetric Standards |        |           |        |
|------------------------|-------------|---------------|-----------------------------------|--------|-----------|--------|
|                        |             |               | Monoterpenes                      |        | Aromatics |        |
|                        |             |               | PCRF                              | StdDev | PCRF      | StdDev |
| toluene                | 1.40        | 0.02          | -                                 | -      | 1.42      | 0.02   |
| ethylbenzene           | 1.40        | 0.05          | -                                 | -      | 1.39      | 0.02   |
| 1,2,4-TMB <sup>a</sup> | 1.42        | 0.02          | -                                 | -      | 1.41      | 0.02   |
| <i>n</i> -decane       | 1.42        | 0.03          | -                                 | -      | -         | -      |
| $\alpha$ -pinene       | 1.43        | 0.03          | 1.39                              | 0.03   | -         | -      |
| $\beta$ -pinene        | 1.42        | 0.02          | -                                 | -      | -         | -      |
| camphene               | -           | -             | 1.43                              | 0.04   | -         | -      |

<sup>a</sup>1,2,4-trimethylbenzene.

**Table S3.** The 24 VOC-related masses monitored by PTR-MS during the ICARTT campaign.

| <i>m/z</i> | Nominal assignment <sup>a</sup>         |
|------------|-----------------------------------------|
| 33         | methanol                                |
| 42         | acetonitrile                            |
| 45         | acetaldehyde                            |
| 47         | ethanol                                 |
| 51         | methyl chloride                         |
| 59         | acetone                                 |
| 61         | acetic acid                             |
| 63         | dimethyl sulfide                        |
| 69         | isoprene                                |
| 71         | methyl vinyl ketone, methacrolein       |
| 73         | methyl ethyl ketone                     |
| 77         | peroxy acetyl nitrate, carbon disulfide |
| 79         | benzene                                 |
| 81         | monoterpenes                            |
| 87         | pentanal                                |
| 89         | pentanol                                |
| 93         | toluene                                 |
| 99         | cyclohexanone, 2,4-dimethyl-2-pentene   |
| 101        | hexenal                                 |
| 105        | styrene                                 |
| 107        | C <sub>8</sub> aromatics                |
| 121        | C <sub>9</sub> aromatics                |
| 135        | C <sub>10</sub> aromatics               |
| 137        | monoterpenes                            |

<sup>a</sup>Many of these channels were selected to explore the possibility of monitoring the indicated compounds. However, after the ICARTT campaign we concluded that several did not yield useful data.
